# Supplementary material for: Household expenditure of smokers and ex-smokers across socioeconomic groups: results from a large nationwide Australian longitudinal survey
Source: Springer Nature journal article supplement (doi:10.1186/s12889-022-14083-y), 2022-09-08
Supplement: MOESM2 [file 23467998]

Additional file 2.

Table 1: Median expenditure by SEIFA quintile per annum by category (\$A) averaged across waves.

|                     |                           | Alcohol                      | Meals eaten out             | Groceries                     | Education        | Clothing                   | Motor Vehicle Fuel           | Medicine                 | Health Practitioner       | Insurance                   |
|---------------------|---------------------------|------------------------------|-----------------------------|-------------------------------|------------------|----------------------------|------------------------------|--------------------------|---------------------------|-----------------------------|
| <b>Total sample</b> | Ex-smokers<br>Median, IQR | \$1108.7<br>(0–2653.9)       | \$2356.4<br>(1071.7–4171.0) | \$9450.0<br>(6339.5– 13231.8) | \$0<br>(0–200)   | \$982.5<br>(404.5–1958.6)  | \$1850.2<br>(945.3– 3131.6)  | \$365.3<br>(158.3–712.3) | \$571.0<br>(171.3–1348.6) | \$1804.7<br>(952.9–2868.1)  |
|                     | Smokers<br>Median, IQR    | \$1157.6<br>(0–2813.5)       | \$1825<br>(566.5–3214.0)    | \$8258.5<br>(5399.7–11732.0)  | \$0<br>(0–243.2) | \$831.6<br>(286.6–1726.7)  | \$1708.1<br>(840– 2954.2)    | \$205.0<br>(71.7–506.9)  | \$228.4<br>(0–674.3)      | \$1140<br>(265.2–2131.3)    |
| <b>Quintile 1</b>   | Ex-smokers<br>Median, IQR | \$543.1<br>(0–1939.9)        | \$1564<br>(550.0–2826.5)    | \$7939.1<br>(5282.7–10799.4)  | \$0<br>(0–0)     | \$600<br>(238.22–1343.1)   | \$1423.4<br>(709.0– 2592.0)  | \$306.5<br>(112.7–527.7) | \$269.7<br>(0–727.4)      | \$1260.0<br>(511.3–2263.3)  |
|                     | Smokers<br>Median, IQR    | \$1087.2<br>(0–2717.5)       | \$1178.2<br>(0–2729.5)      | \$7821.0<br>(5214.0–10757.9)  | \$0<br>(0–85.9)  | 595.6<br>(196.6–1200.0)    | \$1280.7<br>(616.7–2466.9)   | \$153.7<br>(50.7–376.6)  | \$36.1<br>(0–404.6)       | \$729.3<br>(0–1600)         |
| <b>Quintile 2</b>   | Ex-smokers<br>Median, IQR | \$1087.2<br>(0–2607.0)       | \$1963.6<br>(647.6–3302.8)  | \$8460.5<br>(5565.7–12131.2)  | \$0<br>(0–0)     | \$801.7<br>(335.8–1678.8)  | \$1728.9<br>(900.0–3000.0)   | \$350<br>(152.2–659.6)   | \$436.1<br>(40.5–1090.2)  | \$1597.6<br>(794.0–2662.7)  |
|                     | Smokers<br>Median, IQR    | \$1094.3<br>(0–2717.5)       | \$1793.8<br>(546.5–2945.0)  | \$8348.6<br>(5811.6–11644.2)  | \$0<br>(0–154.1) | \$801.7<br>(289.0–1717.9)  | \$1800.0<br>(945.3–2890.5)   | \$203.0<br>(60.0–500.0)  | \$190.7<br>(0–674.3)      | \$1121.6<br>(243.1–2187.7)  |
| <b>Quintile 3</b>   | Ex-smokers<br>Median, IQR | \$1094.3<br>(0–2607)         | \$2261.6<br>(1092.0–3750.3) | \$8809.7<br>(5939.2–12523.4)  | \$0<br>(0–288.2) | \$1036.0<br>(458.1–1800.0) | \$2049.1<br>(1088.56–3330.4) | \$354.8<br>(153.7–635.3) | \$571.0<br>(207.8–1308.2) | \$1823.1<br>(1032.5–2753.4) |
|                     | Smokers<br>Median, IQR    | \$1386.1<br>(25.5–2813.5)    | \$2034.1<br>(869.0–3391.3)  | \$8099.5<br>(5399.7–11210.0)  | \$0<br>(0–328.6) | \$956.45<br>(345.3–1700.7) | \$1920.5<br>(1024.5–3189.9)  | \$211.1<br>(80.0–507.4)  | \$269.7<br>(0–727.4)      | \$1167.4<br>(480.0–2144.0)  |
| <b>Quintile 4</b>   | Ex-smokers<br>Median, IQR | \$1327.5<br>(443.3–2735.2)   | \$2751.8<br>(1299.6–5214.0) | \$10585.4<br>(7708.3–13914.4) | \$0<br>(0–500)   | \$1151.1<br>(515.4–2302.3) | \$1927.0<br>(1024.5–3545.0)  | \$414.9<br>(203.0–829.8) | \$725.0<br>(300.0–1635.2) | \$2000.0<br>(1147.2–3038.5) |
|                     | Smokers<br>Median, IQR    | \$1662.5<br>(277.4–4246.1)   | \$2678.6<br>(1154.6–4418.0) | \$10428.0<br>(6455.0–14309.0) | \$0<br>(0–616.3) | \$1133.8<br>(458.1–2253.9) | \$2364.0<br>(1280.66–3700.4) | \$265.7<br>(101.5–550.0) | \$500<br>(103.9–1091.1)   | \$1440.7<br>(486.2–2673.9)  |
| <b>Quintile 5</b>   | Ex-smokers<br>Median, IQR | \$1592.155<br>(553.8–2893.5) | \$2885.9<br>(1413.8–5458.9) | \$10585.4<br>(7680.4–14555.4) | \$0<br>(0–657.1) | \$1200<br>(572.6–2748.7)   | \$1921.0<br>(996.4–3273.9)   | \$425.3<br>(202.8–900.0) | \$969.8<br>(381.6–2289.3) | \$2212.5<br>(1337.8–3453.2) |
|                     | Smokers<br>Median, IQR    | \$2123.6<br>(543.1–3939.1)   | \$2751.8<br>(1178.2–5357.3) | \$10565.5<br>(6607.0–15642.0) | \$0<br>(0–636.1) | \$1191.1<br>(453.5–2600.6) | \$1840.0<br>(1055.5–3072.4)  | \$357.6<br>(150.0–659.6) | \$571.0<br>(218.0–1283.7) | \$1638.4<br>(893.3–2673.9)  |

Notes: IQR; Interquartile range.
